# Supplementary material
Source: ML conference proceedings conference paper supplement (https://proceedings.mlr.press/v97/peng19c.html)
Supplement: Supplementary file [file peng19c-supp.pdf]

---

## Supplementary Material: Collaborative Channel Pruning for Deep Networks

---

In this appendix, we first derive approximation of Hessian matrix for other losses. Then we give the realistic speedup of ResNet-50 on ILSVRC-12, and the results of MobileNet-v1 and Inception-v1 on CIFAR-10. Finally we provide the details of auxiliary classifier.

### A. Approximated Hessian Matrix

Let  $f(\mathbf{w}, \mathbf{x}) \in \mathbb{R}^p$  be the output of  $\mathbf{x}$ , and  $\mathbf{y}$  denotes the corresponding ground-truth label vector. We represent the loss function as  $\mathcal{L}$ . Here we consider the general formulation to estimate Hessian matrix. First, we give the gradient  $\nabla \mathcal{L}(f(\mathbf{w}, \mathbf{x}), \mathbf{y})$  as

$$\begin{aligned} \nabla \mathcal{L}(f(\mathbf{w}, \mathbf{x}), \mathbf{y}) &= \sum_i \frac{\partial \mathcal{L}}{\partial f_i} \frac{\partial f_i}{\partial \mathbf{w}} \\ &= \nabla^T f(\mathbf{w}, \mathbf{x}) \frac{\partial \mathcal{L}}{\partial \mathbf{f}}. \end{aligned} \quad (1)$$

where  $\nabla f(\mathbf{w}, \mathbf{x}) \in \mathbb{R}^{p \times d}$  and  $\mathbf{w} \in \mathbb{R}^d$ . The second-order derivative is given by:

$$\begin{aligned} \nabla^2 \mathcal{L}(f(\mathbf{w}, \mathbf{x}), \mathbf{y}) &= \sum_i \frac{\partial \mathcal{L}}{\partial f_i} \nabla^2 f_i(\mathbf{w}, \mathbf{x}) \\ &+ \nabla^T f(\mathbf{w}, \mathbf{x}) \frac{\partial^2 \mathcal{L}}{\partial^2 \mathbf{f}} \nabla f(\mathbf{w}, \mathbf{x}). \end{aligned} \quad (2)$$

where  $\nabla^2 f_i(\mathbf{w}, \mathbf{x}) \in \mathbb{R}^{d \times d}$ . For deep networks,  $\nabla^2 f_i(\mathbf{w}, \mathbf{x})$  often has large computational complexity and is intractable to compute. Here we omit it and use the second term in (2) to approximate  $\nabla^2 \mathcal{L}(f(\mathbf{w}, \mathbf{x}), \mathbf{y})$ , and the final approximated Hessian matrix is given by:

$$\nabla^2 \mathcal{L}(f(\mathbf{w}, \mathbf{x}), \mathbf{y}) \approx \nabla^T f(\mathbf{w}, \mathbf{x}) \frac{\partial^2 \mathcal{L}}{\partial^2 \mathbf{f}} \nabla f(\mathbf{w}, \mathbf{x}). \quad (3)$$

For the least-square loss, since  $\frac{\partial^2 \mathcal{L}}{\partial^2 \mathbf{f}} = \mathbf{I}$  where  $\mathbf{I}$  is the identity matrix, we approximately compute the Hessian matrix as  $\nabla^2 \mathcal{L}(f(\mathbf{w}, \mathbf{x}), \mathbf{y}) \approx \nabla^T f(\mathbf{w}, \mathbf{x}) \nabla f(\mathbf{w}, \mathbf{x})$ . For the cross-entropy loss, the Hessian matrix can be approximated via:

$$\nabla^2 \mathcal{L}(f(\mathbf{w}, \mathbf{x}), \mathbf{y}) \approx \nabla^T f(\mathbf{w}, \mathbf{x}) \Sigma \nabla f(\mathbf{w}, \mathbf{x}). \quad (4)$$

where  $\Sigma = \text{diag}((\mathbf{y} \odot (f(\mathbf{w}, \mathbf{x}) \odot f(\mathbf{w}, \mathbf{x}))))$ ,  $\odot$  stands for element-wise multiplication,  $\oslash$  denotes element-wise division, and  $\text{diag}$  denotes converting the vector into diagonal matrix whose entries along diagonal are the entries of vector  $(\mathbf{y} \odot (f(\mathbf{w}, \mathbf{x}) \odot f(\mathbf{w}, \mathbf{x})))$ .

### B. Latency of ResNet-50 on ILSVRC-12

To evaluate the realistic speedup, we provide the latency of ResNet-50 on ILSVRC-12 before and after channel pruning. When the pruning ratio  $r = 0.40$  for all the layers, the evaluation time is reduced from 146ms to 125ms, and we test the latency on a Nvidia P40 GPU with batch size 64. Note the latency depends on I/O operations, buffer switches and efficiency of linear algebra libraries.

### C. MobileNet-v1 and Inception-v1 on CIFAR-10

In this section, we provide the results of Inception-v1 and MobileNet-v1 on CIFAR-10. The baseline classification accuracy of pre-trained MobileNet-v1 and Inception-v1 on CIFAR-10 are 95.43% and 93.71%, we note that accuracy of uncompressed MobileNet-v1 varies in different papers. In (Zhuang et al., 2018), the baseline accuracy is 93.96%, while in (Kim et al., 2019), the baseline accuracy is 89.97%. we test our algorithm with pruning ratio  $r = 0.30$ . After pruning 30% channels of each layer, the accuracy of Inception-v1 model decreases to 94.54% and the accuracy of MobileNet-v1 model decreases to 92.41%.

### D. Auxiliary Classifier

The auxiliary classifier helps boost the performance, its computational cost is quite small. We utilize the average pooling operation over the feature maps to reduce the size to  $1 \times 1$  in width and height, then we impose a fully-connected layer to project the features to auxiliary classifier. We use cross-entropy loss as auxiliary classifier.

### References

- Kim, D. H., Lee, S. H., Lee, M. K., and Song, B. C. Macro unit-based convolutional neural network for very lightweight deep learning. *Image and Vision Computing*, 2019.
- Zhuang, Z., Tan, M., Zhuang, B., Liu, J., Cao, J., Wu, Q., Huang, J., and Zhu, J. Discrimination-aware channel pruning for deep neural networks. In *Advances in Neural Information Processing Systems (NIPS)*, pp. 883–894. Curran Associates, Inc., 2018.
